## **Air pollution exposure and mitochondrial DNA copy number in the UK Biobank**

**Short title:** Air pollution and mitochondrial DNA copy number

Yun Soo Hong, MD, MHS,<sup>1</sup> Stephanie L. Battle, PhD,<sup>2</sup> Daniela Puiu,<sup>3</sup> Wen Shi, MSE,<sup>2</sup> Nathan Pankratz, PhD,<sup>4</sup> Di Zhao, PhD,<sup>1</sup> Dan E. Arking, PhD,<sup>2</sup> Eliseo Guallar, MD, DrPH<sup>1</sup>

<sup>1</sup> Department of Epidemiology and Medicine, and Welch Center for Prevention, Epidemiology, and Clinical Research, Johns Hopkins University Bloomberg School of Public Health. Baltimore, Maryland, USA

<sup>2</sup> McKusick-Nathans Institute, Department of Genetic Medicine, Johns Hopkins University School of Medicine, Baltimore, Maryland, USA.

<sup>3</sup> Department of Biomedical Engineering, Johns Hopkins University, Baltimore, Maryland, USA.

<sup>4</sup> Department of Laboratory Medicine and Pathology, University of Minnesota Medical School, Minneapolis, Minnesota, USA

**Address for correspondence:** Eliseo Guallar, MD, DrPH, Welch Center for Prevention, Epidemiology and Clinical Research, Johns Hopkins University Bloomberg School of Public Health, 2024 E. Monument Street, Room 2-645, Baltimore, MD 21205. Tel. + (1) 410-614-0574. Fax + (1) 410-955-0476. E-mail [eguallar@jhu.edu](mailto:eguallar@jhu.edu).

**Co-correspondence:** Dan E. Arking, PhD, Johns Hopkins University School of Medicine, 733 N. Broadway, Miller Research Bldg, Room 459, Baltimore, Maryland, USA, 21205. Tel: (410) 502-4867, Fax: (410) 614-8600; E-mail: [arking@jhmi.edu](mailto:arking@jhmi.edu).

**Total word count:** 3,714 words

## ABSTRACT

**Background:** Low levels of mitochondrial DNA copy number (mtDNA-CN) are a biomarker of mitochondrial dysfunction often induced by oxidative stress. Air pollution is a pervasive source of oxidative stress, but the association between air pollution exposure and mtDNA-CN is inconclusive.

**Objective:** We evaluated the association between long-term exposure to  $PM_{\leq 10}$   $\mu m$  diameter ( $PM_{10}$ ) and nitrogen dioxide ( $NO_2$ ) with mtDNA-CN in 195,196 adults in the UK Biobank study.

**Methods:** Annual average  $PM_{10}$  and  $NO_2$  concentrations were estimated using separate land-use regression models for years 2007 and 2010. mtDNA-CN was measured in blood samples collected between 2007 and 2010 and was calculated as the ratio of mitochondrial coverage to the nuclear genome coverage derived from whole-genome sequencing in 195,196 UK Biobank participants. We used standardized values (Z-scores) after log-transformation as the mtDNA-CN metric.

**Results:** The median (interquartile range) annual average concentrations of  $PM_{10}$  and  $NO_2$  were 21.8 (20.3–23.6) and 28.9 (23.7–35.1)  $\mu g/m^3$  in 2007, and 16.2 (15.5–17.1) and 27.8 (22.7–32.4)  $\mu g/m^3$  in 2010. An increase of 10  $\mu g/m^3$  in annual average  $PM_{10}$  and  $NO_2$  exposure was associated with an adjusted difference in mtDNA-CN of -0.089 (95% confidence interval; -0.090, -0.087) and -0.018 (-0.018, -0.017), respectively. The associations persisted for lags of up to 3 years.  $PM_{2.5-10}$  was also inversely associated with mtDNA-CN.

**Conclusions:** In this large-scale study, long-term exposure to  $PM_{10}$  and  $NO_2$  were inversely associated with mtDNA-CN. These findings suggest that oxidative stress-induced mitochondrial dysfunction, reflected by reduced mtDNA-CN, may be an additional mechanism mediating the health effects of air pollution.

**Keywords:** mitochondrial DNA copy number, air pollution, particulate matter, oxidative stress.

## INTRODUCTION

Ambient air pollution is associated with a wide range of acute and chronic health outcomes, including all-cause mortality, cardiovascular and pulmonary morbidity and mortality, cognitive decline, and increased hospital and emergency department visits.<sup>1-8</sup> Exposure to ambient particulate matter (PM) is the 5<sup>th</sup> leading risk factor for mortality worldwide, causing an estimated 4.2 million deaths and a loss of over 103 million disability-adjusted life years in 2015.<sup>2</sup> The adverse health effects of air pollution are mediated through oxidative stress, alterations in innate and adaptive immunity, inflammation, and epigenetic changes.<sup>9-12</sup>

Mitochondria are essential to energy production, generating over 90% of the cell's energy in the form of adenosine triphosphate (ATP).<sup>13</sup> Mitochondria also play a major role in the regulation of metabolism and multiple homeostatic, inflammatory, and apoptotic signaling pathways.<sup>14</sup> Each cell has tens to thousands of mitochondria, and each mitochondrion has 2–10 copies of the mitochondrial chromosome, a circular, double-stranded, haploid DNA strand that encodes 37 genes involved in oxidative phosphorylation or in assembling amino acids into functional proteins.<sup>15</sup> Mitochondrial DNA (mtDNA) is susceptible to oxidative stress caused by excessive reactive oxygen species (ROS) because of its proximity to the mitochondrial membrane where oxidation products are generated and because of its inefficient protection and repair mechanisms.<sup>16</sup> Moreover, damaged mtDNA induces excess ROS production, which may further aggravate and accumulate mtDNA damage.<sup>17,18</sup> Decreased mtDNA copy number (mtDNA-CN) is a marker of mitochondrial dysfunction that can be measured in peripheral blood and is associated with increased all-cause mortality,<sup>19,20</sup> cardiovascular disease,<sup>21-24</sup> and chronic kidney disease (CKD).<sup>25</sup>

While air pollution is a pervasive source of oxidative stress, the association between exposure to air pollution and mtDNA-CN has been inconclusive.<sup>26-35</sup> Among 2,758 healthy

women in the Nurses' Health Study, higher 12-month average particulate matter  $\leq 2.5$   $\mu\text{m}$  in diameter ( $\text{PM}_{2.5}$ ) was associated with lower mtDNA-CN.<sup>26</sup> On the other hand, occupational exposures to PM and respirable dust were associated with higher mtDNA-CN.<sup>31,32</sup> Previous studies are difficult to compare because of small sample sizes,<sup>27,29,33</sup> inadequate control of potential confounders,<sup>28,29</sup> wide variations in exposure concentration and composition,<sup>32,34</sup> possible differences between short- and long-term effects of air pollution, and heterogeneity in exposure assessment and mtDNA-CN measurement.

We therefore evaluated the association between long-term exposure to air pollution ( $\text{PM}_{10}$ ,  $\text{PM}_{2.5}$ ,  $\text{PM}_{2.5-10}$ ,  $\text{NO}_2$ , and  $\text{NO}$ ) with mtDNA-CN in over 190,000 adult men and women from the UK Biobank study.

## METHODS

### Study population

The UK Biobank is a prospective cohort study of approximately 500,000 adults 40 to 69 years of age recruited across the United Kingdom (UK) from 2006 to 2010 via mail based on the UK National Health Services registration.<sup>36</sup> Among 199,945 UK Biobank participants with whole genome sequencing (WGS) data available, we excluded individuals who had their blood samples collected in year 2006 ( $n = 170$ ) or who had abnormal blood cell counts ( $n = 377$ ; **Supplementary Figure 1**). We further excluded participants with missing values on body mass index (BMI;  $n = 824$ ) or information on genetic relatedness ( $n = 165$ ). The final study population was 198,409 (89,138 men and 109,271 women). Analyses for each specific pollutant were further restricted to participants with information on the concentration of each air pollutant (**Supplementary Table 1**).

All participants provided written informed consent prior to participation. The scientific protocol and operational procedures of the UK Biobank study were approved by the North West – Haydock Research Ethics Committee in the UK. The Institutional Review Board of the Johns Hopkins School of Medicine gave ethical approval for this work.

### **Measurement of air pollutant concentrations**

We used data on air pollution estimates provided by the Small Area Health Statistics Unit as part of the BioSHaRE-EU Environmental Determinants of Health project (<http://www.sahsu.org/>). The data were available for 2007 and 2010. For each participant, we used their residential address at the time of the UK Biobank visit to estimate annual average concentrations of each air pollutant.

The estimates of PM<sub>10</sub> and NO<sub>2</sub> for 2007 were derived from European Union (EU)-wide air pollution maps based on a land-use regression (LUR) model for Europe, which incorporated satellite-derived air pollution estimates, with a resolution of 100 × 100 m.<sup>37</sup> The adjusted R<sup>2</sup> across the UK for PM<sub>10</sub> and NO<sub>2</sub> were 0.57 and 0.64, respectively.

The estimates of air pollutants for 2010 were modeled using a LUR model developed as part of the European Study of Cohorts for Air Pollution Effects (ESCAPE).<sup>38,39</sup> The R<sup>2</sup> of training models for PM<sub>2.5</sub>, PM<sub>2.5-10</sub>, and NO in the UK were 0.35–0.60, 0.68–0.79, and 0.83–0.89, respectively. The accuracy of particulate matter estimates was unclear for areas beyond the range of 400 km from Greater London and, therefore, air pollution concentrations were coded as missing for all addresses beyond this range.

### **Measurement of mitochondrial DNA copy number**

To estimate mtDNA-CN in UK Biobank participants, we ran our newly developed MitoHPC pipeline<sup>40</sup> on WGS data accessed through the UK Biobank Research Analysis Platform which contains WGS information from peripheral blood in 199,945 UK Biobank participants. We first obtained the number of mapped reads through Samtools (idxstats command) which we used to calculate the nuclear genome and mitochondrial genome coverage. Nuclear genome coverage was calculated as the product of the total number of aligned reads and the read length divided by the estimated human genome size (3.03 G bp). Mitochondrial genome coverage was calculated as the product of the number of reads aligned to mitochondria and the read length divided by mitochondrial DNA size (16,569 bp). The read length was 151 bp. A raw mtDNA-CN was then calculated as  $2 \times \text{mitochondrial coverage} / \text{nuclear genome coverage}$ . mtDNA-CN was then log-transformed and standardized by subtracting the mean and dividing by the standard deviation (SD). The mtDNA-CN metric in this study thus represents SD units (Z-scores).

For mtDNA-CN measurement, WGS performs substantially better than qPCR or whole exome sequencing (WES).<sup>41</sup> However, as WGS was available only in a subset of the UK Biobank population, we performed a sensitivity analysis using a separate mtDNA-CN metric generated using a combination of WES data and genotyping array probe intensity data available in the full UK Biobank cohort.<sup>42</sup> In brief, with WES data from 49,997 individuals, we generated residuals from a linear regression model of mitochondrial chromosome read counts adjusted for total DNA and potential technical artifacts. We then used rank-transformed mitochondrial SNP probe intensities and generated 250 principal components (PCs) from autosomal nuclear probes by randomly sampling 5% of probes ( $n \sim 19,500$  probes) from odd chromosomes that were on both UKBelieve and Axiom arrays. For each array type, all mitochondrial SNP probes (UKBelieve,  $n = 181$ ; Axiom,  $n = 244$ ) and 250 PCs were regressed on the residuals derived



from the linear regression model using the WES results. Coefficients from each model were subsequently used to generate the predicted values in all UK Biobank participants. The estimates were also standardized by subtracting the mean and dividing by the SD (Z-scores). After applying the same exclusion criteria as the main analysis, 378,607 participants (174,055 men and 204,552 women) were included in the sensitivity analysis.

### **Measurement of other covariates**

Study participants visited one of 22 assessment centers where they completed a touch-screen questionnaire and a computer-assisted interview and provided blood, urine, and saliva samples. Physical measures, including height, weight, and blood pressure, were also taken. All assessments were administered according to a standardized procedure. Participants provided information on age, sex, race / ethnicity, average total household income before tax (<£18,000, £18,000–£30,999, £31,000–£51,999, £52,000–£100,000, and >£100,000), and education (categorized as less than college, college or university degree, professional degree, or none of the above). Smoking status was categorized as never, former, and current smokers. Alcohol intake was categorized as never, former, and current drinkers. Physical activity was measured by self-report using the adapted International Physical Activity Questionnaire (IPAQ) Short Form,<sup>43,44</sup> which was converted into total physical activity in metabolic equivalent task (MET) minutes per week by intensity (walking, moderate, and vigorous physical activity).<sup>45</sup> Total METs were then categorized as low, moderate, and high physical activity based on the IPAQ guideline.<sup>43</sup>

Body mass index (BMI) was calculated as weight in kg divided by height in m squared. Blood pressure was measured using an automated blood pressure monitor (Omron 705 IT, OMRON Healthcare Europe BV). Hypertension was defined as a self-reported physician's

diagnosis of hypertension, a self-reported use of antihypertensive medication, or a measured systolic blood pressure  $\geq 140$  mmHg, or diastolic blood pressure  $\geq 90$  mmHg. Prevalence of myocardial infarction (MI)<sup>46</sup> and stroke were defined by an algorithm developed by the UK Biobank.<sup>47</sup> Cardiovascular disease was defined as the presence of either MI or stroke.

Complete blood count, differential white blood cell (WBC) counts (neutrophils, lymphocytes, monocytes, eosinophils, and basophils), and reticulocytes were measured on fresh samples using an a Beckman automated hematology analyzer.<sup>48</sup> Serum glucose levels were measured by hexokinase analysis, total cholesterol levels by CHO-POD method, low-density lipoprotein (LDL) cholesterol levels by enzymatic protective selection analysis, and triglyceride levels by GPO-POD method (Beckman Coulter AU5800, UK). Hemoglobin A1c (HbA1c) was measured in frozen packed red blood cells using high-performance liquid chromatography (Bio-Rad Variant II Turbo analyzer, Bio-Rad Laboratories, US). Details of the laboratory measurements can be found in the UK Biobank online showcase (<http://ukbiobank.ac.uk>). Diabetes was defined as a self-reported physician's diagnosis of diabetes, a self-reported use of antidiabetic medication, or a measured HbA1c  $\geq 6.5\%$ . Hyperlipidemia was defined as a self-reported use of lipid-lowering medication, or a measured total cholesterol  $\geq 200$  mg/dl or triglycerides  $\geq 150$  mg/dl.

### **Statistical analysis**

For the main analysis, we used the average concentrations of PM<sub>10</sub> and NO<sub>2</sub> in 2007 and 2010 as the exposure and mtDNA-CN derived from blood samples collected in 2007–2010 as the outcome. That is, air pollution measured in 2007 was used as exposure for mtDNA-CN derived from samples collected in 2007–2010 (lags of 0, 1, 2, and 3 years), and air pollution measured in

2010 was used as exposure for mtDNA-CN derived from samples collected in 2010 (lag 0) to ensure that the exposure was measured either in the same year or before the outcome (**Supplementary Table 1**). All measurements were combined into a single dataset for the main analyses, but we also conducted separate analyses by year of air-pollution exposure and blood sample collection. For PM<sub>2.5</sub>, PM<sub>2.5-10</sub>, and NO concentrations with mtDNA-CN measures, we used only air pollution and mtDNA-CN measures from 2010.

We used linear regression models with progressive degrees of adjustment to estimate the association between a 10 µg/m<sup>3</sup> increase in air pollutant exposure and mtDNA-CN using covariates measured at the time of the UK Biobank visit. Model 1 was adjusted for age, sex, self-reported ethnic background, year of air pollution measurement, and year of blood collection. Model 2 was further adjusted for average annual income, education level, smoking, alcohol intake, physical activity, BMI, and history of hypertension, diabetes, hyperlipidemia, and cardiovascular disease. Finally, Model 3 was further adjusted for blood cell counts. Since participants could be genetically related, and also since participants who had blood samples collected in 2010 were included twice in the analysis (using air pollution exposure levels in 2007 and in 2010), we used sandwich covariance matrix estimation (sandwich package in R) using a degrees of freedom-based correction to correct the standard errors for these sources of dependence among observations.

In addition to modeling air pollution as a linear term, we compared the differences in mtDNA-CN by quintiles of air pollutant concentrations using the lowest quintile as the reference, and we modeled air pollutant concentrations as restricted cubic splines with knots at the 5<sup>th</sup>, 27.5<sup>th</sup>, 50<sup>th</sup>, 72.5<sup>th</sup>, and 95<sup>th</sup> percentiles to provide a smooth and flexible description of the dose-response relationship between air pollution and mtDNA-CN.

We performed stratified analyses to identify subgroups that may potentially be more susceptible using pre-specified subgroups: age (<60 or  $\geq$  60), sex, self-reported ethnic background (White, Black, Asian, other), BMI (underweight, normal, overweight, or obese), smoking status (never, former, or current), alcohol intake (never, former, or current), physical activity (low, moderate, or high), hypertension, and diabetes. Finally, we performed sensitivity analysis using the mtDNA-CN metric derived from the WES and mitochondrial SNP probe intensities in the full UK Biobank cohort. For this analysis, because the metric was validated in unrelated White individual, we excluded non-White individuals and who had genetically related individuals (used.in.pca.calculation variable provided by the UK Biobank) in the study. All statistical analyses were performed using R software version 4.1.2.

## RESULTS

The mean age (SD) of the 198,409 study participants (89,138 men and 109,271 women) was 56.5 (8.1) years (**Table 1**). Compared to participants in the lower quintiles of mtDNA-CN, those in the higher quintiles of mtDNA-CN were more likely to be younger and female, to have higher average annual income, to be never or former smokers and physically active, and to have lower body mass index, systolic blood pressure, serum glucose, LDL cholesterol, triglyceride levels, and lower prevalence of hypertension, diabetes, and cardiovascular disease. The median (interquartile range) annual average concentrations of PM<sub>10</sub> and NO<sub>2</sub> were 21.8 (20.3–23.6) and 28.9 (23.7–35.0)  $\mu\text{g}/\text{m}^3$ , respectively, in 2007, and 16.2 (15.5–17.1) and 27.8 (22.7–32.4)  $\mu\text{g}/\text{m}^3$ , respectively, in 2010 (**Supplementary Table 1**). The characteristics of participants included in the PM<sub>10</sub> and the NO<sub>2</sub> analyses were similar.

In the fully-adjusted model, an increase in PM<sub>10</sub> of 10 µg/m<sup>3</sup> was associated with a difference in mtDNA-CN of -0.088 (95% confidence interval [CI] -0.090, -0.087; **Table 2**). For NO<sub>2</sub>, the corresponding difference in mtDNA-CN was -0.018 (-0.018, -0.017). Compared to participants in the lowest quintile of air pollutant exposure, the difference in mtDNA-CN among those in the highest quintile of PM<sub>10</sub> exposure was -0.090 (-0.091, -0.089; *P* for trend < 0.001) and among those in the highest quintile of NO<sub>2</sub> exposure it was -0.033 (-0.046, -0.019; *P* for trend < 0.001). The inverse trend for PM<sub>10</sub> with mtDNA-CN was also evident in spline regression analyses (**Figure 1**). For NO<sub>2</sub>, there was an inverse association between NO<sub>2</sub> and mtDNA-CN at concentrations above 30 µg/m<sup>3</sup>. The associations did not materially change after adjusting for seasonality and additional hematologic parameters (not shown). In sensitivity analyses, the associations were similar when we used the mtDNA-CN metric generated using WES and mitochondrial SNP probe intensities (**Supplementary Table 2**).

In the analysis using air pollutant concentrations and mtDNA-CN measured in the concurrent year (Lag 0), an increase of 10 µg/m<sup>3</sup> in PM<sub>10</sub> and NO<sub>2</sub> was associated with a difference in mtDNA-CN of -0.358 (-0.415, -0.300) and -0.060 (-0.075, -0.045), respectively, in 2007, and with a difference of -0.053 (-0.100, -0.006) and -0.007 (-0.019, 0.005), respectively, in 2010 (**Table 3**). For PM<sub>10</sub> and NO<sub>2</sub> concentrations from 2007 and mtDNA-CN measured in 2008–2010, analyses conducted separately by year of measurement of mtDNA-CN consistently showed an inverse association but did not show a clear trend with increasing lag (**Table 3**). For PM<sub>2.5</sub>, PM<sub>2.5-10</sub>, and NO concentrations and mtDNA-CN measured only in 2010, the fully-adjusted differences in mtDNA-CN associated with an increase of 10 µg/m<sup>3</sup> were -0.040 (-0.135, 0.055), -0.127 (-0.226, -0.027), and -0.004 (-0.009, 0.002), respectively (**Table 4**).

In stratified analysis, the associations between PM<sub>10</sub> and mtDNA-CN were more pronounced in the higher BMI categories ( $P$  for interaction  $< 0.001$ ), in current smokers ( $P$  for interaction  $< 0.001$ ), and in participants with hypertension ( $P$  for interaction = 0.03) and with diabetes ( $P$  for interaction  $< 0.001$ ; **Figure 2**). The associations were similar across other subgroups examined. The subgroup analysis for NO<sub>2</sub> showed similar results.

## DISCUSSION

In this large-scale population-based study, we found that higher concentrations of PM<sub>10</sub> and NO<sub>2</sub> were inversely associated with mtDNA-CN concentrations measured in blood. These findings support the hypothesis that oxidative stress-induced mitochondrial dysfunction, reflected by reduced mtDNA-CN, is a potential mechanism linking air pollution with various adverse health outcomes.

Air pollution is a major cause of mortality and global burden of disease.<sup>1,2</sup> Its health effects include increased mortality, hospital admissions and emergency department visits, and higher risk of pulmonary, cardiovascular, neurodegenerative, and other diseases.<sup>3-8</sup> Exposure to air pollutants causes local inflammation and oxidative stress in the lung and generation of ROS, triggering the release of cytokines, a systemic inflammatory response, and higher levels of stress hormones due to sympathetic activation. Chronic exposure to air pollution can alter innate and adaptive immunity and cause epigenetic changes.<sup>9,10,49-51</sup>

mtDNA-CN fluctuates with changes in energy demands, oxidative stress, and various physiological and environmental conditions.<sup>15,52</sup> mtDNA is a particularly susceptible target of ROS-induced damage and mutation as it lacks protective histones and has limited repair capacity.<sup>16</sup> mtDNA damage and mutation result in inefficient mitochondrial function, which

initially triggers mtDNA replication and increases in mtDNA-CN to enhance energy supply and remove damage. Under prolonged exposure and chronic stress, however, mutations accumulate, mtDNA-CN decreases, and mitochondria become dysfunctional.<sup>17</sup> Mitochondrial dysfunction is characterized by impaired oxidative phosphorylation and energy synthesis, increased ROS generation, disruption of calcium homeostasis and calcium signaling pathways, and alterations in metabolic, inflammatory, and apoptotic signaling pathways due to changes in the expression of associated nuclear genes.<sup>10,15</sup> mtDNA-CN measured in peripheral blood is a useful biomarker reflecting oxidative stress-mediated mitochondrial dysfunction, and it has been associated with adverse health outcomes,<sup>15</sup> including all-cause mortality,<sup>19,20</sup> cardiovascular disease,<sup>21-24</sup> and CKD.<sup>25</sup>

Air pollutants can have adverse effects on mitochondrial structure and function.<sup>10</sup> First, PM can impair the mitochondrial respiratory chain, calcium regulation, and mitochondrial membrane potential, resulting in reduced ATP production.<sup>53-56</sup> For example, exposure to diesel exhaust PM decreased mitochondrial respiratory activity and reduced ATP production in rats.<sup>53</sup> In addition, PM increased mitochondrial permeability transition in other animal models<sup>54,55</sup> and decreased mitochondrial membrane potential in endothelial cells.<sup>56</sup> Second, PM can promote mitochondrial ROS formation via downregulation or loss of function of antioxidant enzymes<sup>57</sup> and activation of inflammatory and inhibition of anti-inflammatory pathways.<sup>58</sup> Third, PM may induce changes in the expression of genes involved in the fission and fusion of mitochondria,<sup>10</sup> leading to both an inhibition of mitochondrial fusion<sup>56</sup> and an increase in the production of giant mitochondria by the fusion of multiple mitochondria.<sup>59</sup> Lastly, PM may damage the integrity and the function of mtDNA through increased levels of ROS within mitochondria or DNA

methylation.<sup>60</sup> However, further studies are needed to understand the link between other air pollutants, such as NO<sub>2</sub>, and mitochondrial dysfunction.

Long-term exposure to air pollution was inversely associated with mtDNA-CN in other studies. In a study of 2,758 healthy women from the Nurses' Health Study, an interquartile range (5.5 µg/m<sup>3</sup>) increase in annual average PM<sub>2.5</sub> was associated with a difference of -0.07 (95% CI -0.13, -0.01) units in mtDNA-CN.<sup>26</sup> In addition, PM exposure in the past year was inversely associated with mtDNA-CN in two elderly populations<sup>30,34</sup> and in three small other studies evaluating the short-term effects of air pollution.<sup>27,29,32</sup> However, PM<sub>2.5</sub> exposure in the past month and the past week were positively associated with mtDNA-CN in an elderly population,<sup>30</sup> and 5-day to 28-day average exposures of black carbon were associated with higher mtDNA-CN.<sup>35</sup>

The results of previous studies are difficult to compare because many studies were small, restricted to occupational exposures or to a highly selected population, and with limited adjustment for potential confounders. Moreover, the durations and concentrations of exposure and the methods of mtDNA-CN assessment varied substantially across studies. Despite these limitations, and consistent with our findings, long-term (≥1 year) exposure to air pollutants was mostly associated with lower mtDNA-CN. Lower mtDNA-CN levels measured in peripheral blood may indicate a more systemic response to long-term air pollution exposure as blood-derived mtDNA-CN is positively associated with gene expression in other tissues including heart, uterus, and arteries.<sup>61</sup>

Evidence on the relationship between non-PM air pollutants and mtDNA-CN is relatively scarce. In our study, NO<sub>2</sub> was inversely associated with mtDNA-CN at higher levels. Similarly, higher concentrations of nitrate (NO<sub>3</sub><sup>-</sup>) as a component of PM<sub>2.5</sub> were associated with lower



mtDNA-CN in a study of elderly men.<sup>34</sup> Prenatal exposure of NO<sub>2</sub> in the last month and third trimester of pregnancy was also inversely associated with placental mtDNA-CN.<sup>62</sup> We, however, did not find any association between NO and mtDNA-CN. Oxidation of atmospheric nitrogen (N<sub>2</sub>) forms NO at high temperatures, which, due to its unstable property, reacts rapidly with oxygen to form NO<sub>2</sub>.<sup>63</sup> Therefore, NO<sub>2</sub> or nitrogen oxides (NO<sub>x</sub>), which includes both NO and NO<sub>2</sub>, may be a better metric to represent long-term outdoor exposures and associated health effects.

We have also evaluated the associations of PM<sub>10</sub> and NO<sub>2</sub> with mtDNA-CN measured with different time intervals (Lags 0–3 years). Regardless of the time interval, each air pollutant was inversely associated with mtDNA-CN but we did not see a clear trend by time interval. These results are difficult to interpret because, in our analysis, different lags include different participants, making it difficult to know if the differences are due to the lags or to the participants included in each lag. In addition, the association between air pollution and mtDNA-CN at lag 0 in 2007 year was much larger than in 2010. This difference may be due to declining levels of air pollution between 2007 and 2010, higher mtDNA-CN in 2010, and differences in participant characteristics. In addition, different modeling methods were used for air pollution estimates in 2007 and 2010. Our analysis needs to be replicated in different populations with a varied range of temperature exposures. In addition, longitudinal studies with multiple measurements of air pollution levels and mtDNA-CN in the same individuals are needed to better understand the response of mtDNA-CN to changes in environmental stressors.

Several limitations need to be considered in the interpretation of our findings. First, mtDNA-CN was measured on a single occasion which limited our ability to evaluate the change in mtDNA-CN over time by exposure concentration. Second, there are inherent limitations of

using air pollution concentrations from prediction models. Only ambient concentrations of air pollutants were available and we were not able to consider personal exposure levels that may vary by activity patterns, workplace exposures, and indoor air pollution. The measurement error in the air pollution levels, however, is likely to be unrelated to mtDNA-CN and would have attenuated the association. Third, as an observational study, there may be unmeasured confounders that we could not account for. Finally, the number of non-White individuals in the UK Biobank was small. Therefore, further studies including diverse populations are needed to better understand variability by race and ethnicity group.

## **CONCLUSIONS**

In this large-scale population-based study, long-term exposure to PM<sub>10</sub> and NO<sub>2</sub> were inversely associated with mtDNA-CN. These findings suggest oxidative stress-induced mitochondrial dysfunction, reflected by reduced mtDNA-CN, as a potential mechanism between air pollution and various adverse health outcomes.

## **ACKNOWLEDGEMENTS**

None.

## **SOURCES OF FUNDING**

This work was supported by the US National Institutes of Health grants R01HL131573 and R01HL144569. This research was also conducted using the UK Biobank Resource under Application Number 17731.

## REFERENCES

1. Global burden of 87 risk factors in 204 countries and territories, 1990-2019: a systematic analysis for the Global Burden of Disease Study 2019. *Lancet* 2020;396(10258):1223-1249. (In eng). DOI: 10.1016/s0140-6736(20)30752-2.
2. Cohen AJ, Brauer M, Burnett R, et al. Estimates and 25-year trends of the global burden of disease attributable to ambient air pollution: an analysis of data from the Global Burden of Diseases Study 2015. *Lancet* 2017;389(10082):1907-1918. (In eng). DOI: 10.1016/s0140-6736(17)30505-6.
3. Di Q, Wang Y, Zanobetti A, et al. Air Pollution and Mortality in the Medicare Population. *N Engl J Med* 2017;376(26):2513-2522. (In eng). DOI: 10.1056/NEJMoa1702747.
4. Schraufnagel DE, Balmes JR, Cowl CT, et al. Air Pollution and Noncommunicable Diseases: A Review by the Forum of International Respiratory Societies' Environmental Committee, Part 1: The Damaging Effects of Air Pollution. *Chest* 2019;155(2):409-416. (In eng). DOI: 10.1016/j.chest.2018.10.042.
5. Rajagopalan S, Al-Kindi SG, Brook RD. Air Pollution and Cardiovascular Disease: JACC State-of-the-Art Review. *J Am Coll Cardiol* 2018;72(17):2054-2070. (In eng). DOI: 10.1016/j.jacc.2018.07.099.
6. Münzel T, Sørensen M, Gori T, et al. Environmental stressors and cardio-metabolic disease: part II-mechanistic insights. *Eur Heart J* 2017;38(8):557-564. (In eng). DOI: 10.1093/eurheartj/ehw294.
7. Bazayr J, Pourvakhshoori N, Khankeh H, Farrokhi M, Delshad V, Rajabi E. A comprehensive evaluation of the association between ambient air pollution and adverse health outcomes of major organ systems: a systematic review with a worldwide approach.

- Environ Sci Pollut Res Int 2019;26(13):12648-12661. (In eng). DOI: 10.1007/s11356-019-04874-z.
8. Faustini A, Rapp R, Forastiere F. Nitrogen dioxide and mortality: review and meta-analysis of long-term studies. *Eur Respir J* 2014;44(3):744-53. (In eng). DOI: 10.1183/09031936.00114713.
  9. Schraufnagel DE, Balmes JR, Cowl CT, et al. Air Pollution and Noncommunicable Diseases: A Review by the Forum of International Respiratory Societies' Environmental Committee, Part 2: Air Pollution and Organ Systems. *Chest* 2019;155(2):417-426. (In eng). DOI: 10.1016/j.chest.2018.10.041.
  10. Daiber A, Kuntic M, Hahad O, et al. Effects of air pollution particles (ultrafine and fine particulate matter) on mitochondrial function and oxidative stress - Implications for cardiovascular and neurodegenerative diseases. *Arch Biochem Biophys* 2020:108662. (In eng). DOI: 10.1016/j.abb.2020.108662.
  11. Ghio AJ, Carraway MS, Madden MC. Composition of air pollution particles and oxidative stress in cells, tissues, and living systems. *J Toxicol Environ Health B Crit Rev* 2012;15(1):1-21. (In eng). DOI: 10.1080/10937404.2012.632359.
  12. Valavanidis A, Fiotakis K, Vlachogianni T. Airborne particulate matter and human health: toxicological assessment and importance of size and composition of particles for oxidative damage and carcinogenic mechanisms. *J Environ Sci Health C Environ Carcinog Ecotoxicol Rev* 2008;26(4):339-62. (In eng). DOI: 10.1080/10590500802494538.
  13. Friedman JR, Nunnari J. Mitochondrial form and function. *Nature* 2014;505(7483):335-43. (In eng). DOI: 10.1038/nature12985.

14. Nunnari J, Suomalainen A. Mitochondria: in sickness and in health. *Cell* 2012;148(6):1145-59. (In eng). DOI: 10.1016/j.cell.2012.02.035.
15. Castellani CA, Longchamps RJ, Sun J, Guallar E, Arking DE. Thinking outside the nucleus: Mitochondrial DNA copy number in health and disease. *Mitochondrion* 2020;53:214-223. (In eng). DOI: 10.1016/j.mito.2020.06.004.
16. Lee HC, Wei YH. Mitochondrial role in life and death of the cell. *J Biomed Sci* 2000;7(1):2-15. (In eng). DOI: 10.1007/bf02255913.
17. Lee HC, Wei YH. Mitochondrial biogenesis and mitochondrial DNA maintenance of mammalian cells under oxidative stress. *Int J Biochem Cell Biol* 2005;37(4):822-34. (In eng). DOI: 10.1016/j.biocel.2004.09.010.
18. Zorov DB, Juhaszova M, Sollott SJ. Mitochondrial reactive oxygen species (ROS) and ROS-induced ROS release. *Physiol Rev* 2014;94(3):909-50. (In eng). DOI: 10.1152/physrev.00026.2013.
19. Ashar FN, Moes A, Moore AZ, et al. Association of mitochondrial DNA levels with frailty and all-cause mortality. *J Mol Med (Berl)* 2015;93(2):177-186. (In eng). DOI: 10.1007/s00109-014-1233-3.
20. Mengel-From J, Thinggaard M, Dalgård C, Kyvik KO, Christensen K, Christiansen L. Mitochondrial DNA copy number in peripheral blood cells declines with age and is associated with general health among elderly. *Hum Genet* 2014;133(9):1149-59. (In eng). DOI: 10.1007/s00439-014-1458-9.
21. Zhang Y, Guallar E, Ashar FN, et al. Association between mitochondrial DNA copy number and sudden cardiac death: findings from the Atherosclerosis Risk in

- Communities study (ARIC). *Eur Heart J* 2017;38(46):3443-3448. (In eng). DOI: 10.1093/eurheartj/ehx354.
22. Ashar FN, Zhang Y, Longchamps RJ, et al. Association of Mitochondrial DNA Copy Number With Cardiovascular Disease. *JAMA Cardiol* 2017;2(11):1247-1255. (In eng). DOI: 10.1001/jamacardio.2017.3683.
  23. Hong YS, Longchamps RJ, Zhao D, et al. Mitochondrial DNA Copy Number and Incident Heart Failure: The Atherosclerosis Risk in Communities (ARIC) Study. *Circulation* 2020;141(22):1823-1825. (In eng). DOI: 10.1161/circulationaha.120.046001.
  24. Zhao D, Bartz TM, Sotoodehnia N, et al. Mitochondrial DNA copy number and incident atrial fibrillation. *BMC Med* 2020;18(1):246. (In eng). DOI: 10.1186/s12916-020-01715-6.
  25. Tin A, Grams ME, Ashar FN, et al. Association between Mitochondrial DNA Copy Number in Peripheral Blood and Incident CKD in the Atherosclerosis Risk in Communities Study. *J Am Soc Nephrol* 2016;27(8):2467-73. (In eng). DOI: 10.1681/asn.2015060661.
  26. Wang X, Hart JE, Liu Q, Wu S, Nan H, Laden F. Association of particulate matter air pollution with leukocyte mitochondrial DNA copy number. *Environ Int* 2020;141:105761. (In eng). DOI: 10.1016/j.envint.2020.105761.
  27. Hou L, Zhang X, Dioni L, et al. Inhalable particulate matter and mitochondrial DNA copy number in highly exposed individuals in Beijing, China: a repeated-measure study. *Part Fibre Toxicol* 2013;10:17. (In eng). DOI: 10.1186/1743-8977-10-17.
  28. Li Z, Zhu M, Du J, Ma H, Jin G, Dai J. Genetic variants in nuclear DNA along with environmental factors modify mitochondrial DNA copy number: a population-based

- exome-wide association study. *BMC Genomics* 2018;19(1):752. (In eng). DOI: 10.1186/s12864-018-5142-7.
29. Wong JYY, Hu W, Downward GS, et al. Personal exposure to fine particulate matter and benzo[a]pyrene from indoor air pollution and leukocyte mitochondrial DNA copy number in rural China. *Carcinogenesis* 2017;38(9):893-899. (In eng). DOI: 10.1093/carcin/bgx068.
30. Pieters N, Janssen BG, Dewitte H, et al. Biomolecular Markers within the Core Axis of Aging and Particulate Air Pollution Exposure in the Elderly: A Cross-Sectional Study. *Environ Health Perspect* 2016;124(7):943-50. (In eng). DOI: 10.1289/ehp.1509728.
31. Xu Y, Li H, Hedmer M, et al. Occupational exposure to particles and mitochondrial DNA - relevance for blood pressure. *Environ Health* 2017;16(1):22. (In eng). DOI: 10.1186/s12940-017-0234-4.
32. Hou L, Zhu ZZ, Zhang X, et al. Airborne particulate matter and mitochondrial damage: a cross-sectional study. *Environ Health* 2010;9:48. (In eng). DOI: 10.1186/1476-069x-9-48.
33. Xia Y, Chen R, Wang C, et al. Ambient air pollution, blood mitochondrial DNA copy number and telomere length in a panel of diabetes patients. *Inhal Toxicol* 2015;27(10):481-7. (In eng). DOI: 10.3109/08958378.2015.1075090.
34. Peng C, Cayir A, Sanchez-Guerra M, et al. Associations of Annual Ambient Fine Particulate Matter Mass and Components with Mitochondrial DNA Abundance. *Epidemiology* 2017;28(6):763-770. (In eng). DOI: 10.1097/ede.0000000000000717.
35. Zhong J, Cayir A, Trevisi L, et al. Traffic-Related Air Pollution, Blood Pressure, and Adaptive Response of Mitochondrial Abundance. *Circulation* 2016;133(4):378-87. (In eng). DOI: 10.1161/circulationaha.115.018802.



36. Sudlow C, Gallacher J, Allen N, et al. UK biobank: an open access resource for identifying the causes of a wide range of complex diseases of middle and old age. *PLoS Med* 2015;12(3):e1001779. (In eng). DOI: 10.1371/journal.pmed.1001779.
37. Vienneau D, de Hoogh K, Bechle MJ, et al. Western European land use regression incorporating satellite- and ground-based measurements of NO<sub>2</sub> and PM<sub>10</sub>. *Environ Sci Technol* 2013;47(23):13555-64. (In eng). DOI: 10.1021/es403089q.
38. Eeftens M, Beelen R, de Hoogh K, et al. Development of Land Use Regression models for PM<sub>2.5</sub>, PM<sub>2.5</sub> absorbance, PM<sub>10</sub> and PM<sub>coarse</sub> in 20 European study areas; results of the ESCAPE project. *Environ Sci Technol* 2012;46(20):11195-205. (In eng). DOI: 10.1021/es301948k.
39. Beelen R, Hoek G, Vienneau D, et al. Development of NO<sub>2</sub> and NO<sub>x</sub> land use regression models for estimating air pollution exposure in 36 study areas in Europe – The ESCAPE project. *Atmospheric Environment* 2013;72:10-23. DOI: <https://doi.org/10.1016/j.atmosenv.2013.02.037>.
40. Battle SL, Puiu D, Group TOMW, et al. A Bioinformatics Pipeline for Estimating Mitochondria DNA Copy Number and Heteroplasmy Levels from Whole Genome Sequencing Data. *medRxiv* 2021:2021.12.28.21268452. DOI: 10.1101/2021.12.28.21268452.
41. Longchamps RJ, Castellani CA, Yang SY, et al. Evaluation of mitochondrial DNA copy number estimation techniques. *PLoS One* 2020;15(1):e0228166. DOI: 10.1371/journal.pone.0228166.

42. Liu X, Longchamps RJ, Wiggins KL, et al. Association of mitochondrial DNA copy number with cardiometabolic diseases. *Cell Genom* 2021;1(1). DOI: 10.1016/j.xgen.2021.100006.
43. IPAQ. Guidelines for data processing and analysis of the International Physical Activity Questionnaire (IPAQ)-short and long forms. [http://biobank.ndph.ox.ac.uk/showcase/showcase/docs/ipaq\\_analysis.pdf](http://biobank.ndph.ox.ac.uk/showcase/showcase/docs/ipaq_analysis.pdf) 2005:1-15.
44. Craig CL, Marshall AL, Sjöström M, et al. International physical activity questionnaire: 12-country reliability and validity. *Med Sci Sports Exerc* 2003;35(8):1381-95. (In eng). DOI: 10.1249/01.Mss.0000078924.61453.Fb.
45. Cassidy S, Chau JY, Catt M, Bauman A, Trenell MI. Cross-sectional study of diet, physical activity, television viewing and sleep duration in 233,110 adults from the UK Biobank; the behavioural phenotype of cardiovascular disease and type 2 diabetes. *BMJ Open* 2016;6(3):e010038. (In eng). DOI: 10.1136/bmjopen-2015-010038.
46. Schnier C. Definitions of Acute Myocardial Infarction and Main Myocardial Infarction. UK Biobank, 2017. ([https://biobank.ndph.ox.ac.uk/showcase/showcase/docs/alg\\_outcome\\_mi.pdf](https://biobank.ndph.ox.ac.uk/showcase/showcase/docs/alg_outcome_mi.pdf)).
47. Rannikmäe K, Ngoh K, Bush K, et al. Accuracy of identifying incident stroke cases from linked health care data in UK Biobank. *Neurology* 2020;95(6):e697-e707. (In eng). DOI: 10.1212/wnl.00000000000009924.
48. Elliott P, Peakman TC. The UK Biobank sample handling and storage protocol for the collection, processing and archiving of human blood and urine. *Int J Epidemiol* 2008;37(2):234-44. (In eng). DOI: 10.1093/ije/dym276.

49. Møller P, Danielsen PH, Karotki DG, et al. Oxidative stress and inflammation generated DNA damage by exposure to air pollution particles. *Mutat Res Rev Mutat Res* 2014;762:133-66. (In eng). DOI: 10.1016/j.mrrev.2014.09.001.
50. Niemann B, Rohrbach S, Miller MR, Newby DE, Fuster V, Kovacic JC. Oxidative Stress and Cardiovascular Risk: Obesity, Diabetes, Smoking, and Pollution: Part 3 of a 3-Part Series. *J Am Coll Cardiol* 2017;70(2):230-251. (In eng). DOI: 10.1016/j.jacc.2017.05.043.
51. Saffari A, Daher N, Shafer MM, Schauer JJ, Sioutas C. Global perspective on the oxidative potential of airborne particulate matter: a synthesis of research findings. *Environ Sci Technol* 2014;48(13):7576-83. (In eng). DOI: 10.1021/es500937x.
52. Cline SD. Mitochondrial DNA damage and its consequences for mitochondrial gene expression. *Biochim Biophys Acta* 2012;1819(9-10):979-91. (In eng). DOI: 10.1016/j.bbagr.2012.06.002.
53. Karoui A, Crochemore C, Mulder P, et al. An integrated functional and transcriptomic analysis reveals that repeated exposure to diesel exhaust induces sustained mitochondrial and cardiac dysfunctions. *Environ Pollut* 2019;246:518-526. (In eng). DOI: 10.1016/j.envpol.2018.12.049.
54. Holland NA, Fraiser CR, Sloan RC, 3rd, Devlin RB, Brown DA, Wingard CJ. Ultrafine Particulate Matter Increases Cardiac Ischemia/Reperfusion Injury via Mitochondrial Permeability Transition Pore. *Cardiovasc Toxicol* 2017;17(4):441-450. (In eng). DOI: 10.1007/s12012-017-9402-6.
55. Nichols CE, Shepherd DL, Knuckles TL, et al. Cardiac and mitochondrial dysfunction following acute pulmonary exposure to mountaintop removal mining particulate matter.

- Am J Physiol Heart Circ Physiol 2015;309(12):H2017-30. (In eng). DOI: 10.1152/ajpheart.00353.2015.
56. Miao X, Li W, Niu B, et al. Mitochondrial dysfunction in endothelial cells induced by airborne fine particulate matter (<2.5 µm). *J Appl Toxicol* 2019;39(10):1424-1432. (In eng). DOI: 10.1002/jat.3828.
57. Hatzis C, Godleski JJ, González-Flecha B, Wolfson JM, Koutrakis P. Ambient particulate matter exhibits direct inhibitory effects on oxidative stress enzymes. *Environ Sci Technol* 2006;40(8):2805-11. (In eng). DOI: 10.1021/es0518732.
58. Zhao Q, Chen H, Yang T, et al. Direct effects of airborne PM2.5 exposure on macrophage polarizations. *Biochim Biophys Acta* 2016;1860(12):2835-43. (In eng). DOI: 10.1016/j.bbagen.2016.03.033.
59. Villarreal-Calderon R, Franco-Lira M, González-Maciel A, et al. Up-regulation of mRNA ventricular PRNP prion protein gene expression in air pollution highly exposed young urbanites: endoplasmic reticulum stress, glucose regulated protein 78, and nanosized particles. *Int J Mol Sci* 2013;14(12):23471-91. (In eng). DOI: 10.3390/ijms141223471.
60. Breton CV, Song AY, Xiao J, et al. Effects of air pollution on mitochondrial function, mitochondrial DNA methylation, and mitochondrial peptide expression. *Mitochondrion* 2019;46:22-29. (In eng). DOI: 10.1016/j.mito.2019.04.001.
61. Yang SY, Castellani CA, Longchamps RJ, et al. Blood-derived mitochondrial DNA copy number is associated with gene expression across multiple tissues and is predictive for incident neurodegenerative disease. *Genome Res* 2021;31(3):349-358. DOI: 10.1101/gr.269381.120.

62. Janssen BG, Munters E, Pieters N, et al. Placental mitochondrial DNA content and particulate air pollution during in utero life. *Environ Health Perspect* 2012;120(9):1346-52. (In eng). DOI: 10.1289/ehp.1104458.
63. Jarvis DJ, Adamkiewicz G, Heroux ME, Rapp R, Kelly RJ. Nitrogen dioxide. In: WHO guidelines for indoor air quality: selected pollutants. Geneva: World Health Organization. 2010.

## FIGURE LEGENDS

**Figure 1.** Average mitochondrial DNA copy number levels by PM<sub>10</sub> and NO<sub>2</sub> concentrations.

The curves represent estimated mitochondrial DNA copy number levels (solid line) and their 95% confidence intervals (gray area) by PM<sub>10</sub> and NO<sub>2</sub> concentrations based on fully adjusted regression models using restricted cubic splines to model air pollutants with knots at the 5<sup>th</sup>, 27.5<sup>th</sup>, 50<sup>th</sup>, 72.5<sup>th</sup>, and 95<sup>th</sup> percentiles of its distribution. The spline regression model was adjusted for age, sex, self-reported ethnic background, year of air pollution measurement, year of blood collection, average annual income, education level, smoking, alcohol intake, physical activity, body mass index, history of hypertension, diabetes, hyperlipidemia, and cardiovascular disease, and blood cell counts (red blood cell, neutrophils, lymphocytes, monocytes, eosinophils, basophils, and platelets).

**Figure 2.** Average difference in mitochondrial DNA copy number associated with a 10 µg/m<sup>3</sup> increase in PM<sub>10</sub> (A) and NO<sub>2</sub> (B) in subgroups.

The figure displays the difference in mitochondrial DNA copy number associated with a 10 µg/m<sup>3</sup> increase in PM<sub>10</sub> (A) and NO<sub>2</sub> (B) in models adjusted for age, sex, race, year of air pollution measurement, year of blood collection, average annual income, education level, smoking, alcohol intake, physical activity, body mass index, history of hypertension, diabetes, hyperlipidemia, and cardiovascular disease, and blood cell counts (red blood cell, neutrophils, lymphocytes, monocytes, eosinophils, basophils, and platelets). Pre-specified subgroups were age (<60 or ≥ 60), sex, self-reported ethnic background (White, Black, Asian, or Other), body mass index (underweight, normal, overweight, or obese), smoking status (never, former, or

current), alcohol intake (never, former, or current), physical activity (low, moderate, or high), and presence of hypertension and diabetes, separately.

**Table 1.** Participant characteristics by quintiles of mitochondrial DNA copy number.

|                                            | <b>Overall<br/>(n=198,409)</b> | <b>Quintile 1<br/>(n=43,955)</b> | <b>Quintile 2<br/>(n=39,585)</b> | <b>Quintile 3<br/>(n=38,521)</b> | <b>Quintile 4<br/>(n=38,788)</b> | <b>Quintile 5<br/>(n=37,560)</b> |
|--------------------------------------------|--------------------------------|----------------------------------|----------------------------------|----------------------------------|----------------------------------|----------------------------------|
| <b>mtDNA-CN*</b>                           | -0.05<br>(-4.84, 7.02)         | -1.20<br>(-4.84, -0.78)          | -0.48<br>(-0.78, -0.26)          | 0.01<br>(-0.26, 0.21)            | 0.51<br>(0.21, 0.80)             | 1.32<br>(0.80, 7.02)             |
| <b>Age (years)</b>                         | 56.5 (8.1)                     | 57.5 (8.1)                       | 56.8 (8.1)                       | 56.5 (8.1)                       | 56.0 (8.1)                       | 55.4 (8.0)                       |
| <b>Men (%)</b>                             | 44.9                           | 49.3                             | 46.2                             | 44.4                             | 42.8                             | 41.2                             |
| <b>Self-reported ethnic background (%)</b> |                                |                                  |                                  |                                  |                                  |                                  |
| White                                      | 94.1                           | 94.5                             | 94.4                             | 94.5                             | 94.2                             | 92.8                             |
| Black                                      | 1.5                            | 0.9                              | 1.0                              | 1.3                              | 1.6                              | 2.8                              |
| Asian                                      | 2.4                            | 2.6                              | 2.5                              | 2.2                              | 2.3                              | 2.2                              |
| Other                                      | 1.6                            | 1.5                              | 1.7                              | 1.5                              | 1.5                              | 1.7                              |
| <b>Average income (%)</b>                  |                                |                                  |                                  |                                  |                                  |                                  |
| < £18,000                                  | 18.9                           | 21.8                             | 19.4                             | 18.8                             | 17.7                             | 16.3                             |
| £18,000 – £30,999                          | 21.6                           | 22.4                             | 21.9                             | 21.4                             | 21.4                             | 20.6                             |
| £31,000 – £51,999                          | 22.6                           | 21.1                             | 22.3                             | 22.9                             | 23.2                             | 23.7                             |
| £52,000 – £100,000                         | 17.8                           | 15.4                             | 17.2                             | 17.8                             | 18.7                             | 20.2                             |
| > £100,000                                 | 4.7                            | 4.0                              | 4.6                              | 4.8                              | 5.0                              | 5.5                              |
| <b>Education (%)</b>                       |                                |                                  |                                  |                                  |                                  |                                  |
| Less than college                          | 37.8                           | 36.8                             | 37.8                             | 38.2                             | 38.2                             | 38.4                             |
| College or university degree               | 33.1                           | 30.6                             | 32.5                             | 32.9                             | 34.1                             | 35.8                             |
| Professional degree                        | 11.6                           | 12.1                             | 11.5                             | 11.7                             | 11.4                             | 11.2                             |
| <b>Smoking (%)</b>                         |                                |                                  |                                  |                                  |                                  |                                  |
| Never                                      | 55.1                           | 52.7                             | 54.6                             | 55.0                             | 56.0                             | 57.2                             |
| Former                                     | 34.8                           | 35.4                             | 34.4                             | 35.0                             | 34.4                             | 34.6                             |
| Current                                    | 9.7                            | 11.3                             | 10.4                             | 9.5                              | 9.1                              | 7.8                              |
| <b>Alcohol intake (%)</b>                  |                                |                                  |                                  |                                  |                                  |                                  |
| Never                                      | 4.3                            | 4.6                              | 4.3                              | 4.3                              | 4.1                              | 4.1                              |
| Former                                     | 3.4                            | 4.0                              | 3.6                              | 3.3                              | 3.2                              | 2.9                              |
| Current                                    | 92.0                           | 91.0                             | 91.8                             | 92.2                             | 92.5                             | 92.8                             |
| <b>Physical activity (%)</b>               |                                |                                  |                                  |                                  |                                  |                                  |
| Low                                        | 15.0                           | 15.9                             | 15.2                             | 14.8                             | 14.9                             | 14.2                             |
| Moderate                                   | 33.0                           | 32.8                             | 33.4                             | 33.2                             | 32.9                             | 32.9                             |



|                                         |              |               |              |              |              |              |
|-----------------------------------------|--------------|---------------|--------------|--------------|--------------|--------------|
| High                                    | 32.9         | 31.2          | 32.3         | 33.2         | 33.5         | 34.4         |
| <b>BMI (kg/m<sup>2</sup>)</b>           | 27.4 (4.7)   | 28.0 (5.1)    | 27.7 (4.8)   | 27.4 (4.6)   | 27.1 (4.5)   | 26.6 (4.4)   |
| <b>SBP (mmHg)</b>                       | 137.6 (18.4) | 139.3 (18.7)  | 138.1 (18.5) | 137.5 (18.4) | 136.9 (18.3) | 136.0 (18.1) |
| <b>Glucose (mg/dL)</b>                  | 92.2 (22.0)  | 93.8 (24.8)   | 92.7 (22.9)  | 92.0 (21.0)  | 91.5 (20.9)  | 90.7 (19.2)  |
| <b>Total cholesterol (mg/dL)</b>        | 220.3 (43.9) | 219.9 (45.3)  | 220.9 (44.1) | 220.8 (43.7) | 220.5 (43.2) | 219.2 (43.0) |
| <b>LDL cholesterol (mg/dL)</b>          | 137.5 (33.4) | 137.7 (34.4)  | 138.2 (33.5) | 138.0 (33.3) | 137.5 (32.9) | 136.2 (32.7) |
| <b>Triglyceride (mg/dL)<sup>§</sup></b> | 130.9 (96.5) | 139.6 (103.0) | 136.0 (99.2) | 132.0 (96.4) | 127.2 (93.7) | 118.5 (86.7) |
| <b>Hypertension (%)</b>                 | 52.9         | 58.3          | 54.6         | 52.7         | 50.5         | 47.6         |
| <b>Diabetes (%)</b>                     | 5.8          | 7.6           | 6.0          | 5.6          | 5.0          | 4.3          |
| <b>Hyperlipidemia (%)</b>               | 80.6         | 82.5          | 81.7         | 81.1         | 79.9         | 77.3         |
| <b>Prevalent MI (%)</b>                 | 1.6          | 2.1           | 1.7          | 1.5          | 1.4          | 1.2          |
| <b>Prevalent stroke (%)</b>             | 1.4          | 1.8           | 1.4          | 1.4          | 1.2          | 1.2          |
| <b>Prevalent CVD (%)</b>                | 2.9          | 3.8           | 2.9          | 2.8          | 2.5          | 2.3          |

Abbreviations: BMI, body mass index; CVD, cardiovascular disease; LDL, low-density lipoprotein; MI, myocardial infarction; mtDNA-CN, mitochondrial DNA copy number; NO<sub>2</sub>, nitrogen dioxide; PM, particulate matter; SBP, systolic blood pressure.

\* Median (range); <sup>§</sup>Median (interquartile range).

**Table 2.** Average difference in mitochondrial DNA copy number (95% confidence interval) associated with a 10  $\mu\text{g}/\text{m}^3$  increase in  $\text{PM}_{10}$  and  $\text{NO}_2$  and by quintile of air pollutant.

|                        | Linear<br>(per 10 $\mu\text{g}/\text{m}^3$<br>increase) | Quintile 1                 | Quintile 2                 | Quintile 3                 | Quintile 4                 | Quintile 5                  | P trend |
|------------------------|---------------------------------------------------------|----------------------------|----------------------------|----------------------------|----------------------------|-----------------------------|---------|
| <b>PM<sub>10</sub></b> |                                                         | 11.8, 17.8<br>(n = 48,125) | 17.8, 20.4<br>(n = 48,219) | 20.4, 21.9<br>(n = 47,851) | 21.9, 23.7<br>(n = 48,084) | 23.7, 36.6<br>(n = 47,904)  |         |
| <b>Model 1</b>         | -0.107<br>(-0.108, -0.105)                              | Reference                  | -0.038<br>(-0.048, -0.029) | -0.071<br>(-0.089, -0.053) | -0.082<br>(-0.098, -0.066) | -0.109<br>(-0.123, -0.096)  | < 0.001 |
| <b>Model 2</b>         | -0.102<br>(-0.104, -0.101)                              | Reference                  | -0.035<br>(-0.046, -0.025) | -0.058<br>(-0.073, -0.044) | -0.067<br>(-0.080, -0.054) | -0.100<br>(-0.111, -0.089)  | < 0.001 |
| <b>Model 3</b>         | -0.088<br>(-0.090, -0.087)                              | Reference                  | -0.038<br>(-0.042, -0.033) | -0.054<br>(-0.058, -0.050) | -0.059<br>(-0.062, -0.055) | -0.090<br>(-0.091, -0.089)  | < 0.001 |
| <b>NO<sub>2</sub></b>  |                                                         | 7.3, 22.2<br>(n = 48,199)  | 22.2, 26.7<br>(n = 48,078) | 26.7, 30.8<br>(n = 48,193) | 30.8, 36.0<br>(n = 48,062) | 36.0, 128.0<br>(n = 48,082) |         |
| <b>Model 1</b>         | -0.023<br>(-0.023, -0.023)                              | Reference                  | -0.009<br>(-0.017, -0.000) | -0.021<br>(-0.031, -0.012) | -0.023<br>(-0.026, -0.020) | -0.058<br>(-0.073, -0.043)  | < 0.001 |
| <b>Model 2</b>         | -0.021<br>(-0.021, -0.020)                              | Reference                  | 0.007<br>(-0.003, 0.016)   | 0.000<br>(-0.007, 0.007)   | -0.002<br>(-0.006, 0.003)  | -0.043<br>(-0.060, -0.026)  | < 0.001 |
| <b>Model 3</b>         | -0.018<br>(-0.018, -0.017)                              | Reference                  | 0.012<br>(0.010, 0.014)    | 0.014<br>(0.012, 0.016)    | 0.010<br>(0.008, 0.013)    | -0.033<br>(-0.046, -0.019)  | < 0.001 |

Abbreviations:  $\text{NO}_2$ , nitrogen dioxide; PM, particulate matter.

Model 1: Adjusted for age, sex, self-reported ethnic background, year of air pollution measurement, and year of blood collection; Model 2: Model 1 + average annual income, education level, smoking, alcohol intake, physical activity, body mass index, and history of hypertension, diabetes, hyperlipidemia, and cardiovascular disease; Model 3: Model 2 + cell counts (red blood cells, neutrophil, lymphocytes, basophils, eosinophils, monocytes, and platelets).

**Table 3.** Average difference in mitochondrial DNA copy number associated with a 10  $\mu\text{g}/\text{m}^3$  increase in  $\text{PM}_{10}$  and  $\text{NO}_2$  by lag of measurement between air pollution and mtDNA copy number (0, 1, 2, and 3 years).

| mtDNA copy number measured in      | Air pollutant measured in 2007    |                                   |                                   |                                   | Air pollutant measured in 2010    |
|------------------------------------|-----------------------------------|-----------------------------------|-----------------------------------|-----------------------------------|-----------------------------------|
|                                    | 2007 (Lag 0)                      | 2008 (Lag 1)                      | 2009 (Lag 2)                      | 2010 (Lag 3)                      | 2010 (Lag 0)                      |
| <b><math>\text{PM}_{10}</math></b> | Range: 13.0, 32.7<br>(n = 18,717) | Range: 12.2, 36.5<br>(n = 67,488) | Range: 11.8, 36.6<br>(n = 63,927) | Range: 12.8, 36.6<br>(n = 45,005) | Range: 11.8, 26.2<br>(n = 45,046) |
| <b>Model 1</b>                     | -0.365<br>(-0.424, -0.306)        | -0.086<br>(-0.115, -0.056)        | -0.102<br>(-0.129, -0.074)        | -0.081<br>(-0.109, -0.054)        | -0.076<br>(-0.124, -0.029)        |
| <b>Model 2</b>                     | -0.331<br>(-0.394, -0.268)        | -0.073<br>(-0.105, -0.041)        | -0.077<br>(-0.107, -0.047)        | -0.101<br>(-0.131, -0.071)        | -0.078<br>(-0.129, -0.026)        |
| <b>Model 3</b>                     | -0.358<br>(-0.415, -0.300)        | -0.068<br>(-0.098, -0.039)        | -0.061<br>(-0.088, -0.033)        | -0.080<br>(-0.108, -0.052)        | -0.053<br>(-0.100, -0.006)        |
| <b><math>\text{NO}_2</math></b>    | Range: 7.3, 102.0<br>(n = 18,720) | Range: 7.3, 111.3<br>(n = 67,609) | Range: 8.3, 128.3<br>(n = 64,153) | Range: 8.4, 117.9<br>(n = 45,066) | Range: 12.9, 97.7<br>(n = 45,066) |
| <b>Model 1</b>                     | -0.074<br>(-0.089, -0.059)        | -0.017<br>(-0.026, -0.008)        | -0.027<br>(-0.034, -0.020)        | -0.014<br>(-0.021, -0.006)        | -0.011<br>(-0.023, 0.001)         |
| <b>Model 2</b>                     | -0.055<br>(-0.071, -0.039)        | -0.005<br>(-0.015, 0.004)         | -0.023<br>(-0.031, -0.015)        | -0.019<br>(-0.027, -0.011)        | -0.011<br>(-0.024, 0.002)         |
| <b>Model 3</b>                     | -0.060<br>(-0.075, -0.045)        | -0.006<br>(-0.015, 0.003)         | -0.019<br>(-0.026, -0.012)        | -0.014<br>(-0.022, -0.007)        | -0.007<br>(-0.019, 0.005)         |

Abbreviations: mtDNA, mitochondrial DNA;  $\text{NO}_2$ , nitrogen dioxide; PM, particulate matter.

Model 1: Adjusted for age, sex, and self-reported ethnic background; Model 2: Model 1 + average annual income, education level, smoking, alcohol intake, physical activity, body mass index, and history of hypertension, diabetes, hyperlipidemia, and cardiovascular disease; Model 3: Model 2 + cell counts (red blood cells, neutrophil, lymphocytes, basophils, eosinophils, monocytes, and platelets).

**Table 4.** Average difference in mitochondrial DNA copy number associated with a 10  $\mu\text{g}/\text{m}^3$  increase in  $\text{PM}_{2.5}$ ,  $\text{PM}_{2.5-10}$ , and NO measured concurrently in 2010 (Lag 0).

|                            |                                    |
|----------------------------|------------------------------------|
| <b>PM<sub>2.5</sub></b>    | Range: 8.2, 18.4<br>(n = 45,046)   |
| <b>Model 1</b>             | -0.073 (-0.168, 0.022)             |
| <b>Model 2</b>             | -0.052 (-0.155, 0.051)             |
| <b>Model 3</b>             | -0.040 (-0.135, 0.055)             |
| <b>PM<sub>2.5-10</sub></b> | Range: 5.6, 12.2<br>(n = 45,046)   |
| <b>Model 1</b>             | -0.119 (-0.219, -0.019)            |
| <b>Model 2</b>             | -0.155 (-0.263, -0.046)            |
| <b>Model 3</b>             | -0.127 (-0.226, -0.027)            |
| <b>NO</b>                  | Range: 19.7, 252.0<br>(n = 45,066) |
| <b>Model 1</b>             | -0.005 (-0.010, 0.001)             |
| <b>Model 2</b>             | -0.003 (-0.010, 0.003)             |
| <b>Model 3</b>             | -0.004 (-0.009, 0.002)             |

Abbreviations: mtDNA, mitochondrial DNA; NO, nitric oxide; PM, particulate matter.

Model 1: Adjusted for age, sex, and self-reported ethnic background; Model 2: Model 1 + average annual income, education level, smoking, alcohol intake, physical activity, body mass index, and history of hypertension, diabetes, hyperlipidemia, and cardiovascular disease; Model 3: Model 2 + cell counts (red blood cells, neutrophil, lymphocytes, basophils, eosinophils, monocytes, and platelets).

Figure 1.

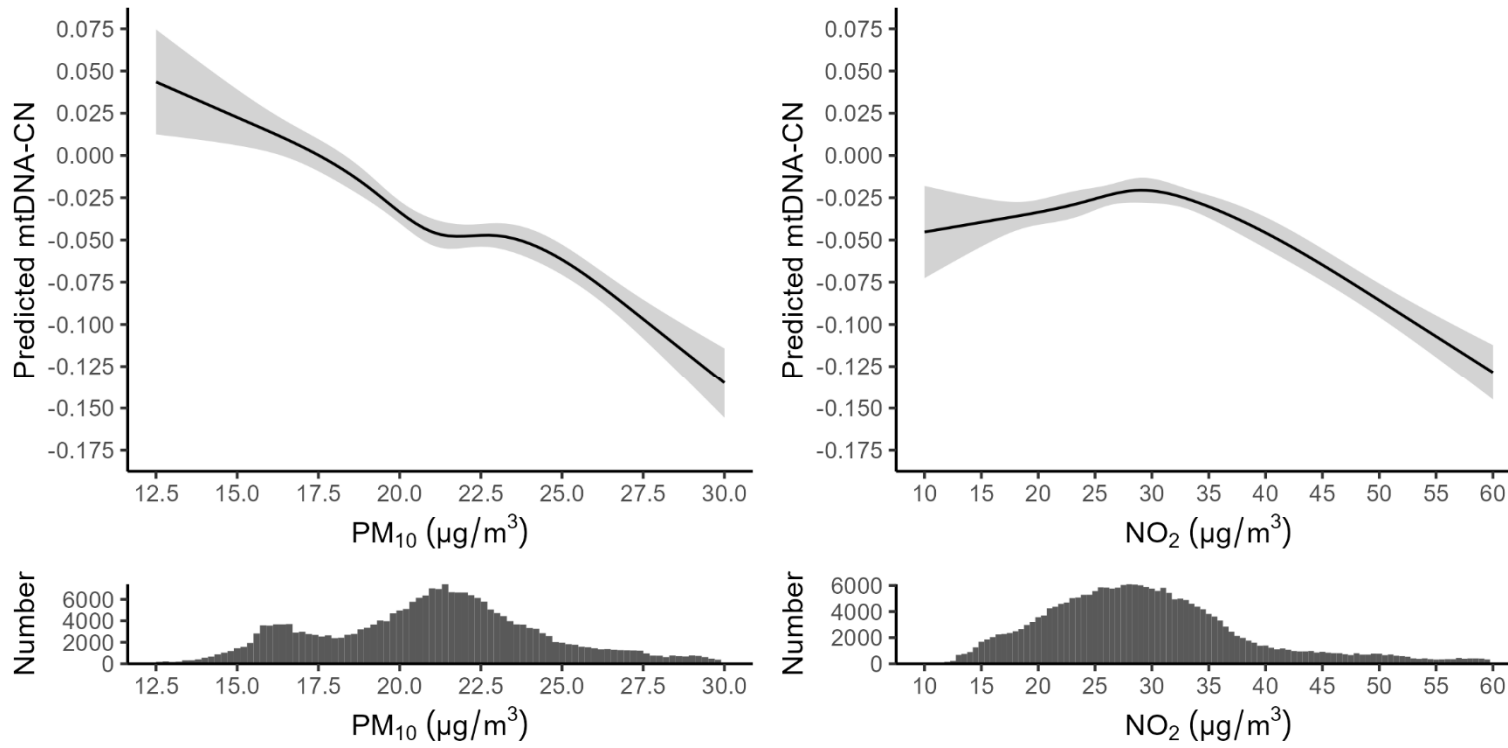

Figure 2.

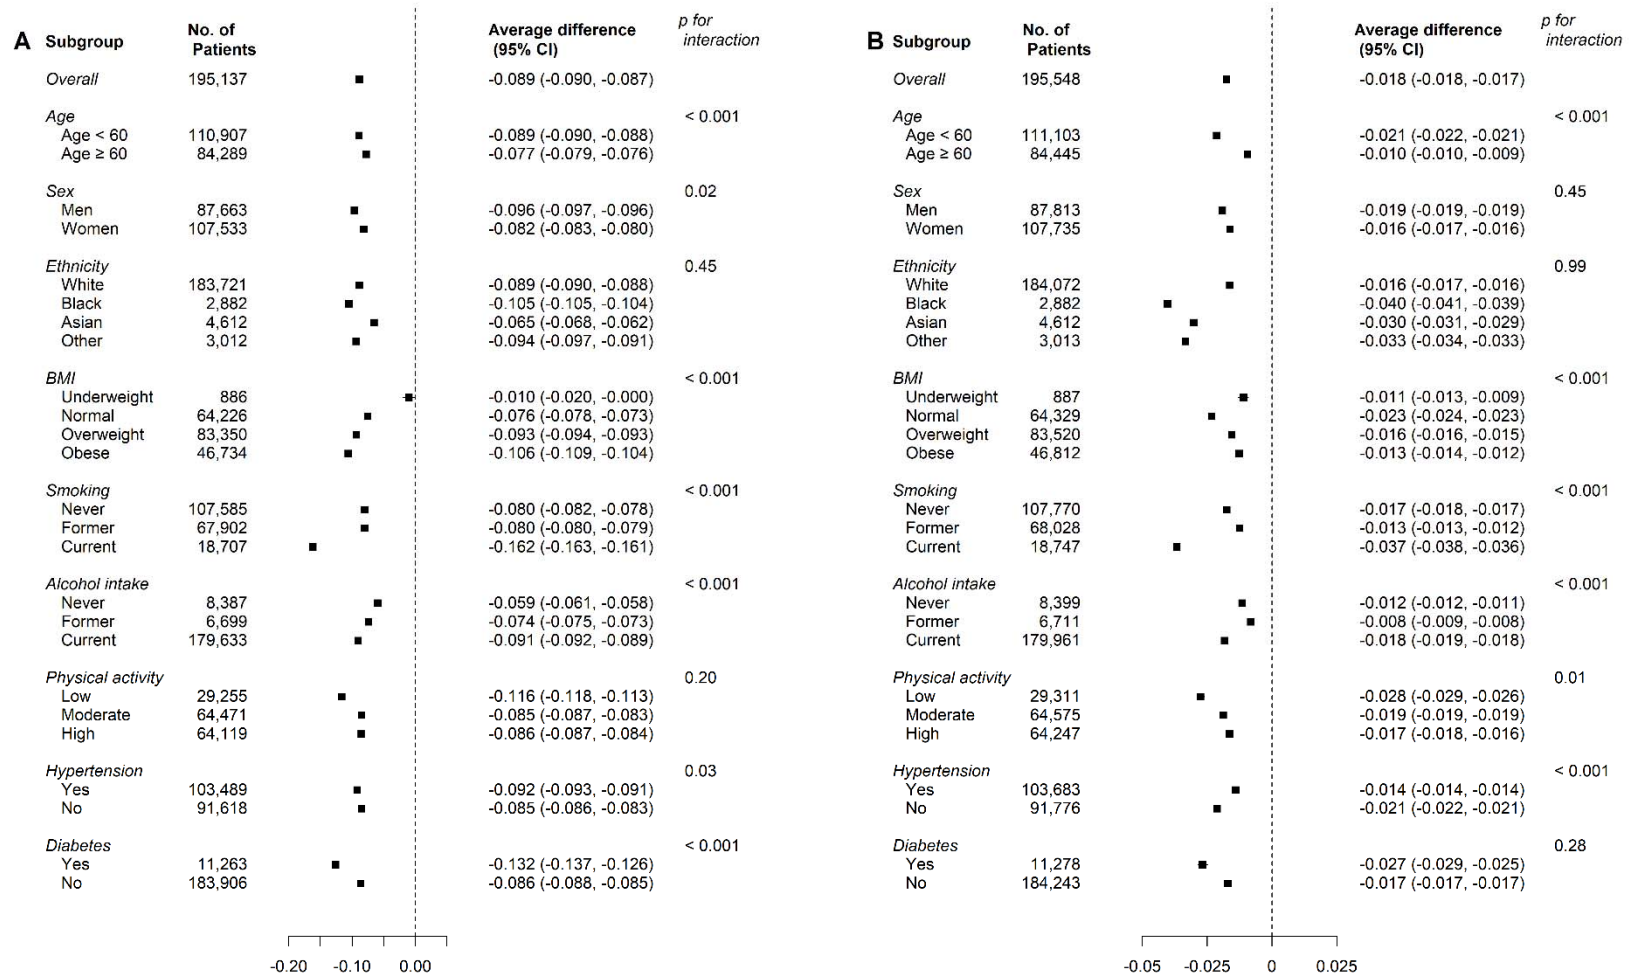

## **SUPPLEMENTARY MATERIALS**

**Supplementary Table 1.** Description of data available on air pollutants and mitochondrial DNA copy number.

**Supplementary Table 2.** Average difference in mitochondrial DNA copy number (95% confidence interval) associated with a 10  $\mu\text{g}/\text{m}^3$  increase in  $\text{PM}_{10}$  and  $\text{NO}_2$  and by quintile of air pollutant in the full UK Biobank.

**Supplementary Figure 1.** Flowchart of study participants.

**Supplementary Table 1.** Description of data available on air pollutants and mitochondrial DNA copy number.

|                            | <b>Year of air pollutant measurement</b> | <b>Year of blood collection</b> | <b>Number of participants</b> | <b>Median (IRQ) of air pollutants (<math>\mu\text{g}/\text{m}^3</math>)</b> |                  |
|----------------------------|------------------------------------------|---------------------------------|-------------------------------|-----------------------------------------------------------------------------|------------------|
| <b>PM<sub>10</sub></b>     | 2007                                     | 2007                            | 18,717                        |                                                                             |                  |
|                            |                                          | 2008                            | 67,488                        |                                                                             |                  |
|                            |                                          | 2009                            | 63,927                        |                                                                             |                  |
|                            |                                          | 2010                            | 45,005                        |                                                                             |                  |
|                            |                                          | All years                       | 195,137                       | 21.8 (20.3–23.6)                                                            |                  |
| <b>PM<sub>2.5</sub></b>    | 2010                                     | 2010                            | 45,046                        | 16.2 (15.5–17.1)                                                            |                  |
|                            |                                          | 2007, 2010                      | All years                     | 195,196                                                                     | 21.2 (18.7–23.1) |
|                            |                                          | <b>NO<sub>2</sub></b>           | 2007                          | 2007                                                                        | 18,720           |
| <b>NO<sub>2</sub></b>      | 2007                                     | 2008                            | 67,609                        |                                                                             |                  |
|                            |                                          | 2009                            | 64,153                        |                                                                             |                  |
|                            |                                          | 2010                            | 45,066                        |                                                                             |                  |
|                            |                                          | All years                       | 195,548                       | 28.9 (23.7–35.0)                                                            |                  |
|                            |                                          | 2010                            | 2010                          | 45,066                                                                      | 27.8 (22.7–32.4) |
| <b>PM<sub>2.5-10</sub></b> | 2007, 2010                               | All years                       | 195,548                       | 28.7 (23.4–34.4)                                                            |                  |
| <b>PM<sub>2.5</sub></b>    | 2010                                     | 2010                            | 45,046                        | 9.9 (9.3–10.4)                                                              |                  |
| <b>PM<sub>2.5-10</sub></b> | 2010                                     | 2010                            | 45,046                        | 6.2 (5.9–6.7)                                                               |                  |
| <b>NO</b>                  | 2010                                     | 2010                            | 45,066                        | 43.0 (35.8–50.4)                                                            |                  |



**Supplementary Table 2.** Average difference in mitochondrial DNA copy number (95% confidence interval) associated with a 10  $\mu\text{g}/\text{m}^3$  increase in  $\text{PM}_{10}$  and  $\text{NO}_2$  and by quintile of air pollutant in the full UK Biobank.

|                                    | Linear                     | Quintile 1                 | Quintile 2                 | Quintile 3                 | Quintile 4                 | Quintile 5                  | P trend |
|------------------------------------|----------------------------|----------------------------|----------------------------|----------------------------|----------------------------|-----------------------------|---------|
| <b><math>\text{PM}_{10}</math></b> |                            | 11.8, 18.3<br>(n = 87,306) | 18.3, 20.5<br>(n = 87,437) | 20.5, 21.9<br>(n = 87,259) | 21.9, 23.6<br>(n = 86,956) | 23.6, 36.6<br>(n = 86,766)  |         |
| <b>Model 1</b>                     | -0.084<br>(-0.085, -0.083) | Reference                  | -0.026<br>(-0.038, -0.015) | -0.054<br>(-0.065, -0.042) | -0.054<br>(-0.066, -0.042) | -0.071<br>(-0.083, -0.059)  | < 0.001 |
| <b>Model 2</b>                     | -0.079<br>(-0.080, -0.078) | Reference                  | -0.024<br>(-0.036, -0.011) | -0.048<br>(-0.060, -0.035) | -0.045<br>(-0.058, -0.032) | -0.064<br>(-0.077, -0.051)  | < 0.001 |
| <b>Model 3</b>                     | -0.068<br>(-0.069, -0.067) | Reference                  | -0.024<br>(-0.036, -0.012) | -0.039<br>(-0.051, -0.027) | -0.035<br>(-0.047, -0.023) | -0.053<br>(-0.066, -0.041)  | < 0.001 |
| <b><math>\text{NO}_2</math></b>    |                            | 7.0, 21.9<br>(n = 87,336)  | 21.9, 26.4<br>(n = 87,488) | 26.4, 30.3<br>(n = 87,192) | 30.3, 35.4<br>(n = 87,385) | 35.4, 138.0<br>(n = 87,207) |         |
| <b>Model 1</b>                     | -0.024<br>(-0.024, -0.023) | Reference                  | -0.013<br>(-0.022, -0.004) | -0.028<br>(-0.037, -0.018) | -0.015<br>(-0.024, -0.005) | -0.058<br>(-0.068, -0.048)  | < 0.001 |
| <b>Model 2</b>                     | -0.021<br>(-0.021, -0.020) | Reference                  | -0.006<br>(-0.016, 0.005)  | -0.014<br>(-0.024, -0.004) | 0.004<br>(-0.006, 0.014)   | -0.046<br>(-0.057, -0.035)  | < 0.001 |
| <b>Model 3</b>                     | -0.019<br>(-0.019, -0.018) | Reference                  | 0.000<br>(-0.009, 0.010)   | -0.003<br>(-0.013, 0.006)  | 0.013<br>(0.004, 0.023)    | -0.036<br>(-0.041, -0.026)  | < 0.001 |

Abbreviations:  $\text{NO}_2$ , nitrogen dioxide; PM, particulate matter.

In this analysis, mitochondrial DNA copy number was derived using whole exome sequencing (WES) and mitochondrial probe intensities to the full UK Biobank cohort.

Model 1: Adjusted for age, sex, self-reported ethnic background, year of air pollution measurement, and year of blood collection; Model 2: Model 1 + average annual income, education level, smoking, alcohol intake, physical activity, body mass index, and history of hypertension, diabetes, hyperlipidemia, and cardiovascular disease; Model 3: Model 2 + cell counts (red blood cells, neutrophil, lymphocytes, basophils, eosinophils, monocytes, and platelets).

### Supplementary Figure 1. Flowchart of study participants.

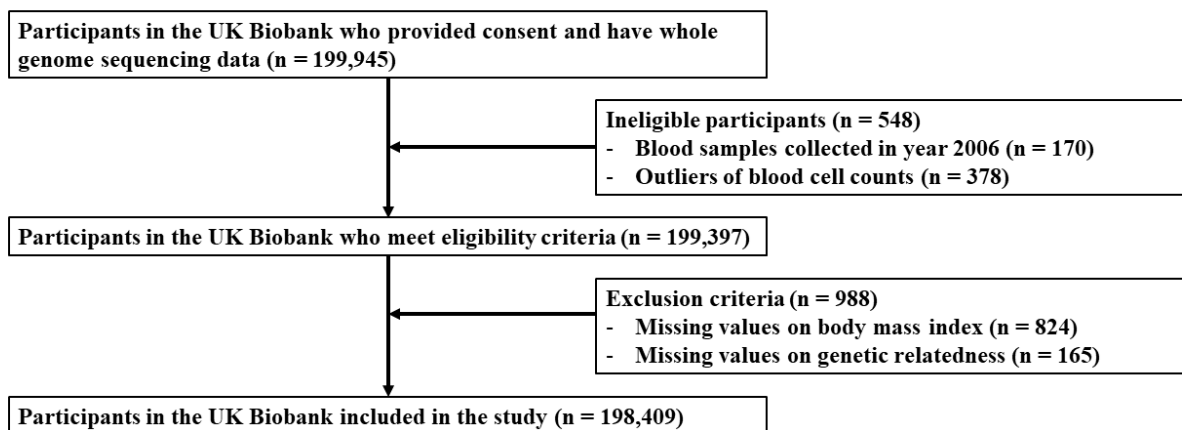

Source: https://medrxiv.org/content/10.1101/2022.04.18.22273996v1.full.pdf
